# Supplementary material for: New aspects of C2 selectivity in electrochemical CO2reduction over oxide-derived copper
Source: Royal Society of Chemistry journal article supplement (doi:10.1039/c9cp06009j), 2019-12-18
Supplement: c9cp06009j1.pdf [file c9cp06009j1.pdf]

## Electronic Supplementary Information (ESI)

### New aspects of C2 selectivity in electrochemical CO<sub>2</sub> reduction over oxide-derived copper

Aamir Hassan Shah,<sup>a,b</sup> Yanjie Wang,<sup>\*,a</sup> Sajjad Hussain,<sup>a,b</sup> Muhammad Bilal Akbar,<sup>a,b</sup> Abebe Reda Woldu,<sup>a,b</sup> Xuehua Zhang<sup>a,b</sup> and Tao He<sup>\*,a,b</sup>

<sup>a</sup> CAS Key Laboratory of Nanosystem and Hierarchical Fabrication, CAS Center for Excellence in Nanoscience, National Center for Nanoscience and Technology, Beijing 100190, China.

<sup>b</sup> University of Chinese Academy of Sciences, Beijing 100049, China

**Figure S1.** XRD patterns of the as-synthesized Cu<sub>2</sub>O NWs and ODCu at –0.5 and –0.1 V vs RHE for 90 min in CO<sub>2</sub>-saturated 0.1 M KHCO<sub>3</sub>.

**Figure S2.** Total current density at different applied voltages in CO<sub>2</sub>-saturated 0.1 M KHCO<sub>3</sub> electrolyte.

**Figure S3.** <sup>1</sup>HNMR of (a) blank and (b) the samples upon polarization at –0.9 V vs RHE for 90 min in CO<sub>2</sub>-saturated 0.1 M KHCO<sub>3</sub> (pH 6.8).

**Figure S4.** Optimized structure of (a) Cu<sub>2</sub>O, (b) Cu<sub>2</sub>O<sub>0.75</sub>, (c) Cu<sub>2</sub>O<sub>0.50</sub>, (d) Cu<sub>2</sub>O<sub>0.25</sub> and (e) Cu.

**Figure S5.** Total DOS of (a) Cu<sub>2</sub>O, (b) Cu<sub>2</sub>O<sub>0.75</sub>, (c) Cu<sub>2</sub>O<sub>0.50</sub>, (d) Cu<sub>2</sub>O<sub>0.25</sub> and (e) Cu.

**Table S1.** Calculated total energies of different systems

**The data of calculations.**

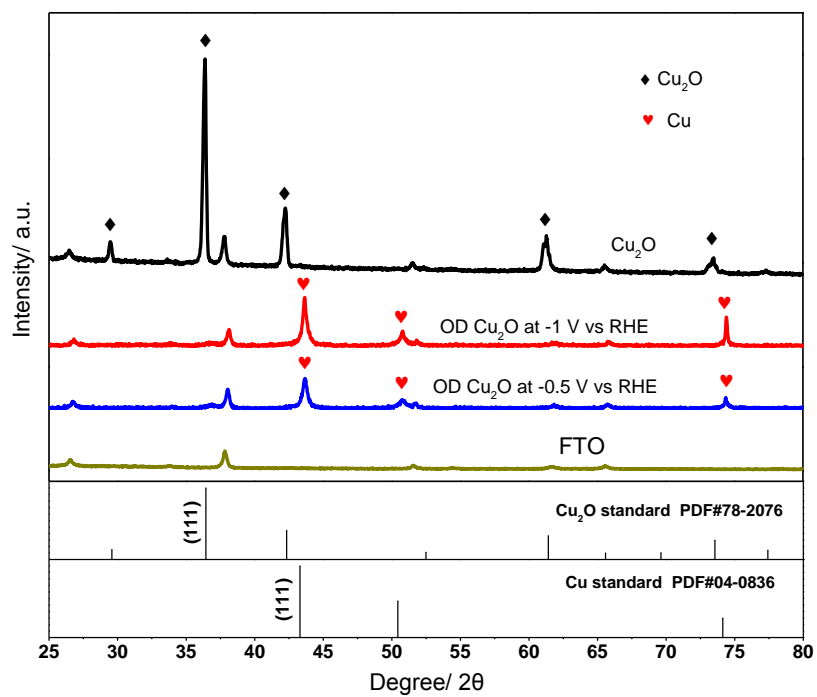

**Figure S1.** XRD patterns of the as-synthesized Cu<sub>2</sub>O NWs and ODCu at -0.5 and -0.1 V vs RHE for 90 min in CO<sub>2</sub>-saturated 0.1 M KHCO<sub>3</sub>.

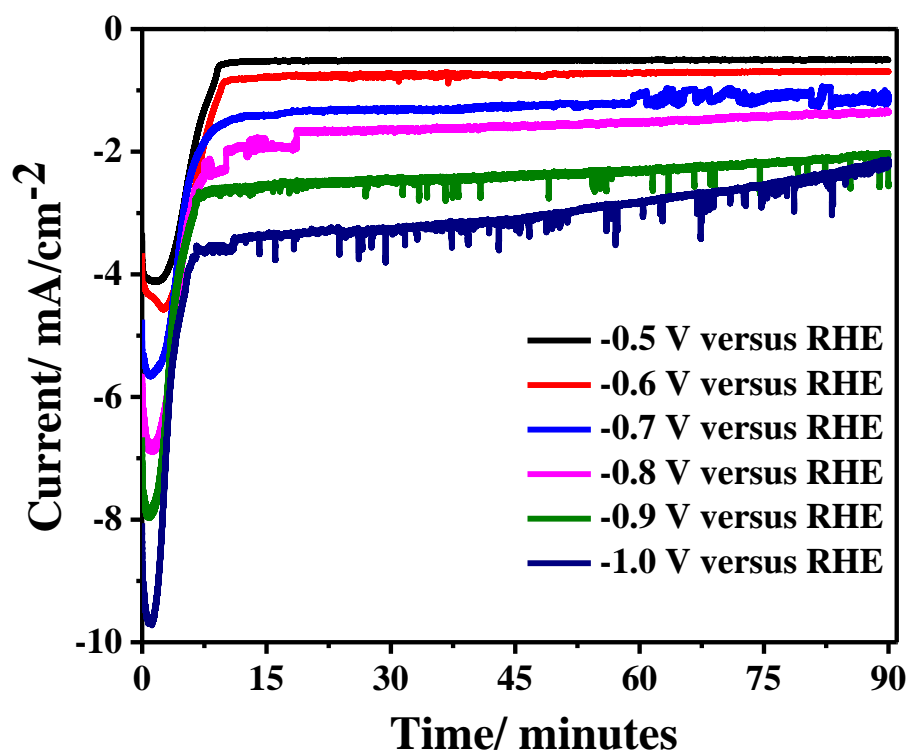

**Figure S2.** Total current density at different applied voltages in CO<sub>2</sub>-saturated 0.1 M KHCO<sub>3</sub> electrolyte.

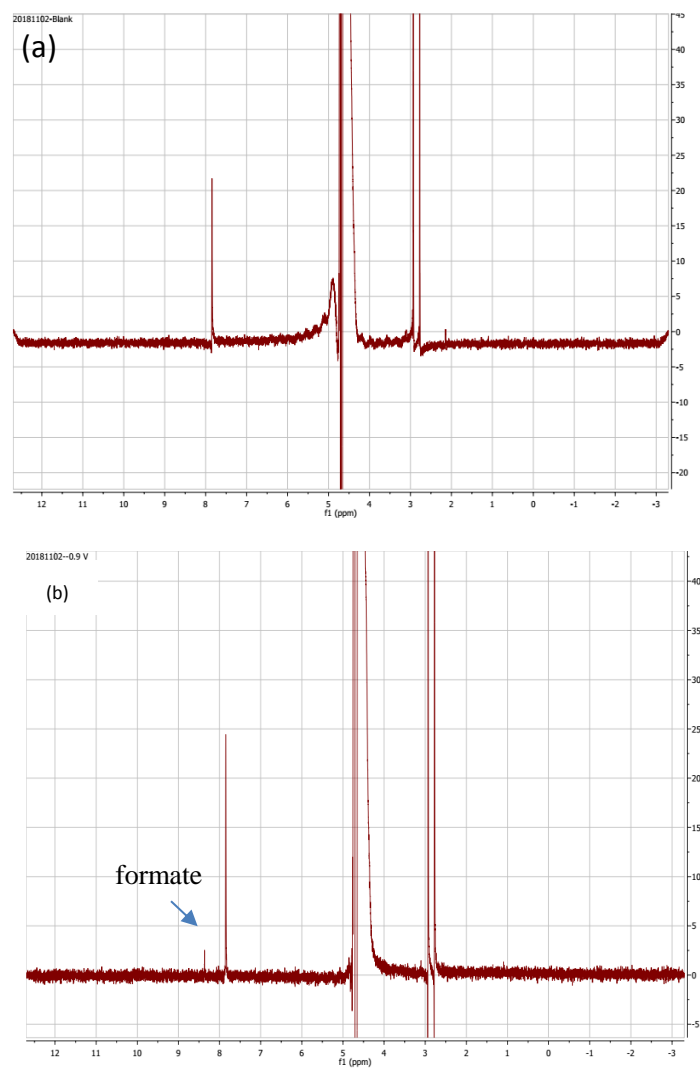

**Figure S3.**  $^1\text{H}$ NMR of (a) blank and (b) the samples upon polarization at  $-0.9$  V vs RHE for 90 min in  $\text{CO}_2$ -saturated  $0.1$  M  $\text{KHCO}_3$  (pH 6.8).

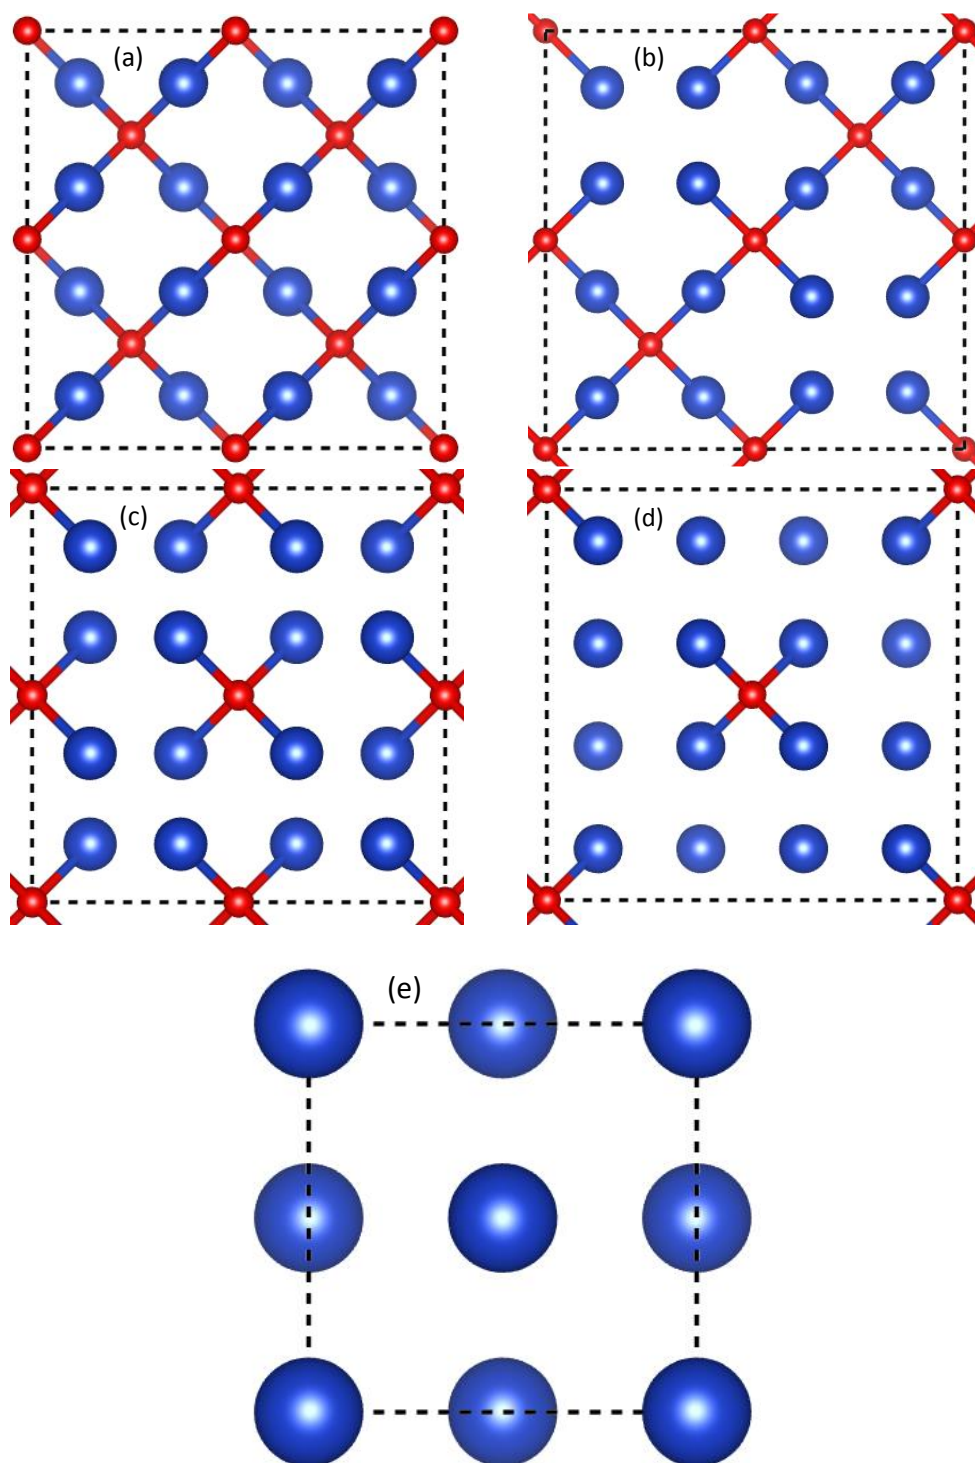

**Figure S4.** Optimized structure of (a)  $\text{Cu}_2\text{O}$ , (b)  $\text{Cu}_2\text{O}_{0.75}$ , (c)  $\text{Cu}_2\text{O}_{0.50}$ , (d)  $\text{Cu}_2\text{O}_{0.25}$  and (e)  $\text{Cu}$ .

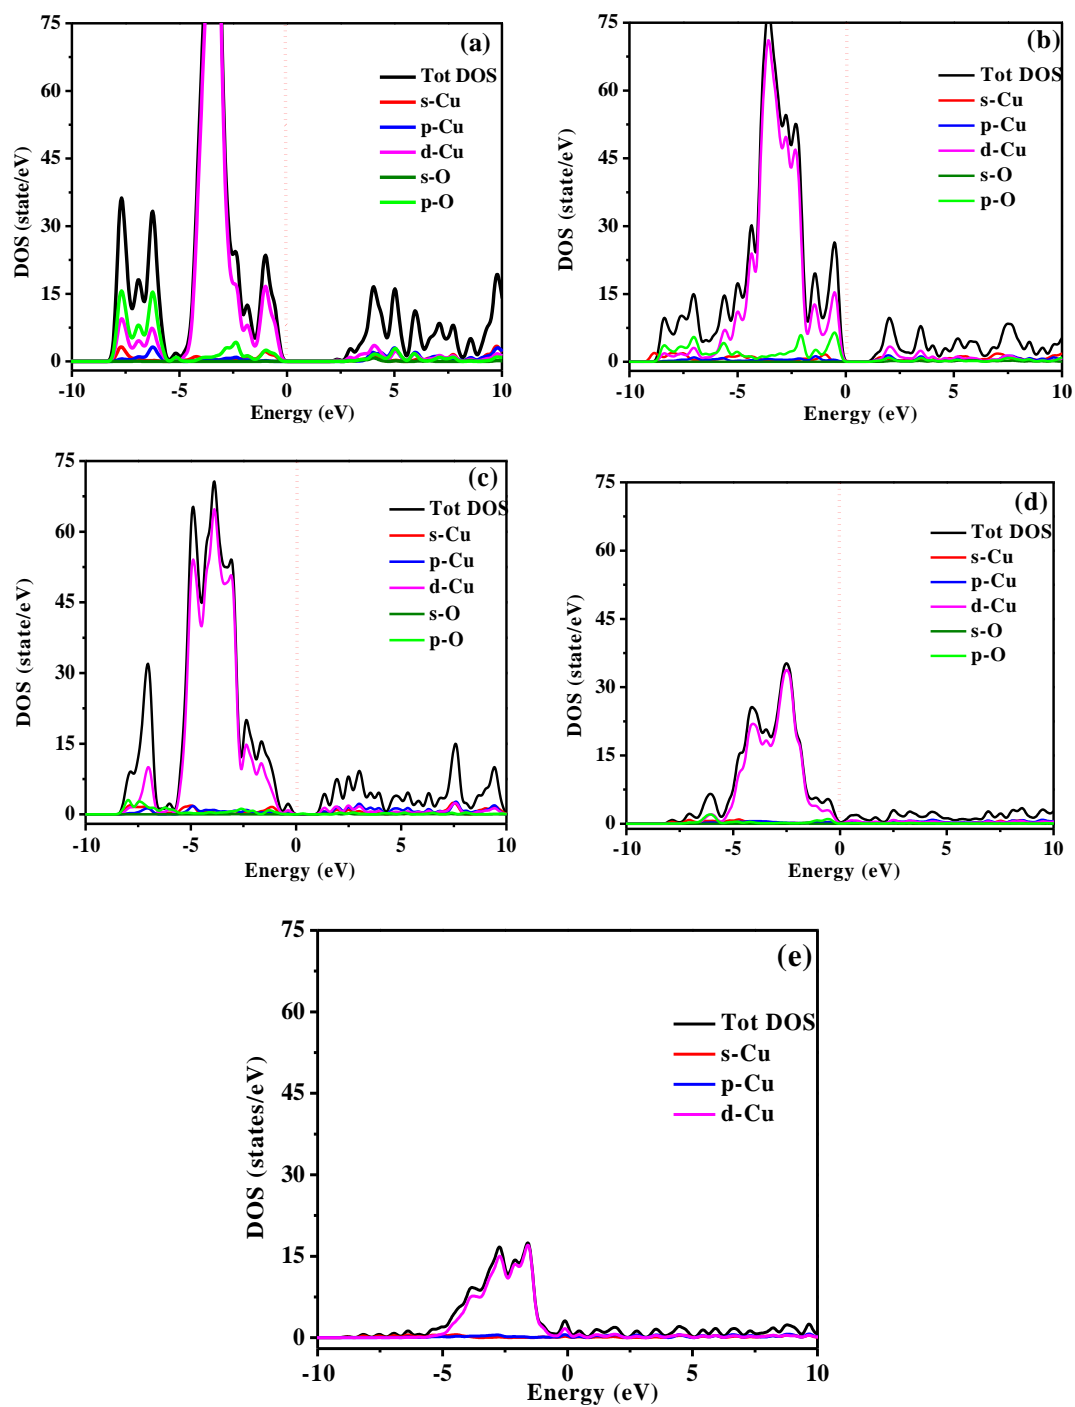

**Figure S5.** Total density of states of (a)  $\text{Cu}_2\text{O}$ , (b)  $\text{Cu}_2\text{O}_{0.75}$ , (c)  $\text{Cu}_2\text{O}_{0.50}$ , (d)  $\text{Cu}_2\text{O}_{0.25}$  and (e) Cu.

**Table S1.** Calculated total energies of different systems

| Systems                                 | Total Energy (eV) |
|-----------------------------------------|-------------------|
| clean Cu(111)                           | -279.63           |
| clean Cu <sub>2</sub> O(111)            | -237.02           |
| isolated OCCO                           | -30.05            |
| OCCO adsorbed on Cu(111)                | -312.88           |
| OCCO adsorbed on Cu <sub>2</sub> O(111) | -272.56           |

## The data of calculations

### 1. TOTEN

#### 1) TOTEN Cu

|             |       |   |                  |
|-------------|-------|---|------------------|
| free energy | TOTEN | = | 544.01209894 eV  |
| free energy | TOTEN | = | -310.94863142 eV |
| free energy | TOTEN | = | -349.09110945 eV |
| free energy | TOTEN | = | -349.92710880 eV |
| free energy | TOTEN | = | -311.42242599 eV |
| free energy | TOTEN | = | -280.42918731 eV |
| free energy | TOTEN | = | -280.03896181 eV |
| free energy | TOTEN | = | -279.78044419 eV |
| free energy | TOTEN | = | -279.68063761 eV |
| free energy | TOTEN | = | -279.64041618 eV |
| free energy | TOTEN | = | -279.62992567 eV |
| free energy | TOTEN | = | -279.62894182 eV |
| free energy | TOTEN | = | -279.62956314 eV |
| free energy | TOTEN | = | -279.63148655 eV |
| free energy | TOTEN | = | -279.63316599 eV |
| free energy | TOTEN | = | -279.63459389 eV |
| free energy | TOTEN | = | -279.63495665 eV |
| free energy | TOTEN | = | -279.63514117 eV |
| free energy | TOTEN | = | -279.63532357 eV |
| free energy | TOTEN | = | -279.63541715 eV |
| free energy | TOTEN | = | -279.63547866 eV |
| free energy | TOTEN | = | -279.63549920 eV |
| free energy | TOTEN | = | -279.63550811 eV |
| free energy | TOTEN | = | -279.63550811 eV |



## 2) TOTEN Cu<sub>2</sub>O

|             |       |   |                  |
|-------------|-------|---|------------------|
| free energy | TOTEN | = | -221.43694073 eV |
| free energy | TOTEN | = | -237.02323457 eV |
| free energy | TOTEN | = | -221.42487094 eV |
| free energy | TOTEN | = | -221.43046047 eV |
| free energy | TOTEN | = | -221.43038742 eV |
| free energy | TOTEN | = | -221.43036059 eV |
| free energy | TOTEN | = | -221.43042140 eV |
| free energy | TOTEN | = | -221.43044129 eV |
| free energy | TOTEN | = | -221.43045183 eV |
| free energy | TOTEN | = | -221.43045169 eV |
| free energy | TOTEN | = | -237.02415137 eV |
| free energy | TOTEN | = | -221.41115823 eV |
| free energy | TOTEN | = | -221.42196664 eV |
| free energy | TOTEN | = | -221.42187769 eV |
| free energy | TOTEN | = | -221.42193971 eV |
| free energy | TOTEN | = | -221.42194036 eV |
| free energy | TOTEN | = | -221.42195729 eV |
| free energy | TOTEN | = | -221.42196946 eV |
| free energy | TOTEN | = | -221.42196999 eV |
| free energy | TOTEN | = | -237.02700685 eV |
| free energy | TOTEN | = | -221.40722630 eV |
| free energy | TOTEN | = | -221.41360755 eV |
| free energy | TOTEN | = | -221.41364937 eV |
| free energy | TOTEN | = | -221.41368145 eV |
| free energy | TOTEN | = | -221.41368712 eV |
| free energy | TOTEN | = | -221.41369957 eV |
| free energy | TOTEN | = | -221.41370747 eV |
| free energy | TOTEN | = | -237.02769993 eV |

free energy TOTEN = -221.40758470 eV  
free energy TOTEN = -221.40986965 eV  
free energy TOTEN = -221.40991408 eV  
free energy TOTEN = -221.40988852 eV  
free energy TOTEN = -221.40990037 eV  
free energy TOTEN = -221.40990117 eV  
free energy TOTEN = -237.02789408 eV

### 3) TOTEN OCCO

free energy TOTEN = -30.05490422 eV  
free energy TOTEN = -30.05490422 eV



#### 4) TOTEN OCCO adsorbed on Cu

|             |       |   |                  |
|-------------|-------|---|------------------|
| free energy | TOTEN | = | -312.87644374 eV |
| free energy | TOTEN | = | -312.87644702 eV |
| free energy | TOTEN | = | -312.87644702 eV |
| free energy | TOTEN | = | -312.87604510 eV |
| free energy | TOTEN | = | -312.87706982 eV |
| free energy | TOTEN | = | -312.87669485 eV |
| free energy | TOTEN | = | -312.87667276 eV |
| free energy | TOTEN | = | -312.87663988 eV |
| free energy | TOTEN | = | -312.87664430 eV |
| free energy | TOTEN | = | -312.87664430 eV |
| free energy | TOTEN | = | -312.87697354 eV |
| free energy | TOTEN | = | -312.87707604 eV |
| free energy | TOTEN | = | -312.87700300 eV |
| free energy | TOTEN | = | -312.87700440 eV |
| free energy | TOTEN | = | -312.87700440 eV |
| free energy | TOTEN | = | -312.87767644 eV |
| free energy | TOTEN | = | -312.87864739 eV |
| free energy | TOTEN | = | -312.87797272 eV |
| free energy | TOTEN | = | -312.87796366 eV |
| free energy | TOTEN | = | -312.87795654 eV |
| free energy | TOTEN | = | -312.87795654 eV |
| free energy | TOTEN | = | -312.87818982 eV |
| free energy | TOTEN | = | -312.88222519 eV |
| free energy | TOTEN | = | -312.87932363 eV |
| free energy | TOTEN | = | -312.87933435 eV |
| free energy | TOTEN | = | -312.87928286 eV |
| free energy | TOTEN | = | -312.87930375 eV |

free energy TOTEN = -312.87929384 eV  
free energy TOTEN = -312.87929819 eV  
free energy TOTEN = -312.87929819 eV  
free energy TOTEN = -312.87536233 eV  
free energy TOTEN = -312.89063710 eV  
free energy TOTEN = -312.87999218 eV  
free energy TOTEN = -312.87984853 eV  
free energy TOTEN = -312.87968042 eV  
free energy TOTEN = -312.87973625 eV  
free energy TOTEN = -312.87969806 eV  
free energy TOTEN = -312.87971499 eV  
free energy TOTEN = -312.87971971 eV  
free energy TOTEN = -312.87971971 eV  
free energy TOTEN = -312.87937038 eV  
free energy TOTEN = -312.88156092 eV  
free energy TOTEN = -312.87997261 eV  
free energy TOTEN = -312.87994950 eV  
free energy TOTEN = -312.87992970 eV  
free energy TOTEN = -312.87993909 eV  
free energy TOTEN = -312.87993454 eV  
free energy TOTEN = -312.87993454 eV  
free energy TOTEN = -312.88043307 eV  
free energy TOTEN = -312.88071710 eV  
free energy TOTEN = -312.88066903 eV  
free energy TOTEN = -312.88065554 eV  
free energy TOTEN = -312.88064669 eV  
free energy TOTEN = -312.88064669 eV  
free energy TOTEN = -312.88030826 eV  
free energy TOTEN = -312.88293086 eV  
free energy TOTEN = -312.88244840 eV

|             |       |   |                  |
|-------------|-------|---|------------------|
| free energy | TOTEN | = | -312.88237652 eV |
| free energy | TOTEN | = | -312.88228094 eV |
| free energy | TOTEN | = | -312.88228267 eV |
| free energy | TOTEN | = | -312.88227470 eV |
| free energy | TOTEN | = | -312.88227915 eV |
| free energy | TOTEN | = | -312.88227915 eV |
| free energy | TOTEN | = | -312.87537038 eV |
| free energy | TOTEN | = | -312.88594145 eV |
| free energy | TOTEN | = | -312.88401479 eV |
| free energy | TOTEN | = | -312.88363905 eV |
| free energy | TOTEN | = | -312.88331740 eV |
| free energy | TOTEN | = | -312.88331937 eV |
| free energy | TOTEN | = | -312.88327613 eV |
| free energy | TOTEN | = | -312.88329714 eV |
| free energy | TOTEN | = | -312.88329978 eV |
| free energy | TOTEN | = | -312.88329978 eV |

5) TOTEN OCCO adsorbed on Cu<sub>2</sub>O

|             |       |   |                  |
|-------------|-------|---|------------------|
| free energy | TOTEN | = | -255.99870565 eV |
| free energy | TOTEN | = | -255.99837711 eV |
| free energy | TOTEN | = | -255.99848183 eV |
| free energy | TOTEN | = | -255.99856682 eV |
| free energy | TOTEN | = | -255.99856382 eV |
| free energy | TOTEN | = | -255.99856159 eV |
| free energy | TOTEN | = | -272.54358813 eV |
| free energy | TOTEN | = | -255.99941952 eV |
| free energy | TOTEN | = | -256.00116526 eV |
| free energy | TOTEN | = | -256.00116332 eV |
| free energy | TOTEN | = | -256.00115643 eV |

free energy TOTEN = -272.54571420 eV  
free energy TOTEN = -255.99215718 eV  
free energy TOTEN = -256.00823602 eV  
free energy TOTEN = -256.00801776 eV  
free energy TOTEN = -256.00797771 eV  
free energy TOTEN = -256.00799013 eV  
free energy TOTEN = -256.00801271 eV  
free energy TOTEN = -256.00801711 eV  
free energy TOTEN = -272.55117229 eV  
free energy TOTEN = -255.94980180 eV  
free energy TOTEN = -256.01902936 eV  
free energy TOTEN = -256.01740241 eV  
free energy TOTEN = -256.01726678 eV  
free energy TOTEN = -256.01719341 eV  
free energy TOTEN = -256.01724511 eV  
free energy TOTEN = -256.01728134 eV  
free energy TOTEN = -256.01728075 eV  
free energy TOTEN = -272.55764449 eV  
free energy TOTEN = -255.72622331 eV  
free energy TOTEN = -256.02621304 eV  
free energy TOTEN = -256.01884298 eV  
free energy TOTEN = -256.01815316 eV  
free energy TOTEN = -256.01756780 eV  
free energy TOTEN = -256.01768909 eV  
free energy TOTEN = -256.01782380 eV  
free energy TOTEN = -256.01781756 eV  
free energy TOTEN = -256.01781573 eV  
free energy TOTEN = -272.55263610 eV  
free energy TOTEN = -255.86616657 eV  
free energy TOTEN = -256.02399566 eV

free energy TOTEN = -256.02021543 eV  
free energy TOTEN = -256.01988570 eV  
free energy TOTEN = -256.01958728 eV  
free energy TOTEN = -256.01968441 eV  
free energy TOTEN = -256.01975368 eV  
free energy TOTEN = -256.01975265 eV  
free energy TOTEN = -256.01975140 eV  
free energy TOTEN = -272.55865707 eV  
free energy TOTEN = -256.01858206 eV  
free energy TOTEN = -256.02363836 eV  
free energy TOTEN = -256.02360823 eV  
free energy TOTEN = -256.02358226 eV  
free energy TOTEN = -256.02358131 eV  
free energy TOTEN = -256.02358680 eV  
free energy TOTEN = -272.56161045 eV  
free energy TOTEN = -256.00899162 eV  
free energy TOTEN = -256.02841792 eV  
free energy TOTEN = -256.02811903 eV  
free energy TOTEN = -256.02804690 eV  
free energy TOTEN = -256.02801714 eV  
free energy TOTEN = -256.02803597 eV  
free energy TOTEN = -256.02804995 eV  
free energy TOTEN = -256.02806174 eV  
free energy TOTEN = -256.02807182 eV  
free energy TOTEN = -256.02808290 eV  
free energy TOTEN = -256.02808973 eV  
free energy TOTEN = -272.56443211 eV



## 2. Structure geometry

### 1) DOS geometry

#### (1) POSCAR\_Cu

Cu4

```
1.0000000000000000
 3.6346653935657716  0.0000000000000000  0.0000000000000000
 0.0000000000000000  3.6346653935657716  0.0000000000000000
 0.0000000000000000  0.0000000000000000  3.6346653935657716
```

Cu

4

Direct

```
0.0000000000000000  0.0000000000000000  0.0000000000000000
0.5000000000000000  0.5000000000000000  0.0000000000000000
0.5000000000000000  0.0000000000000000  0.5000000000000000
0.0000000000000000  0.5000000000000000  0.5000000000000000
```

```
0.00000000E+00  0.00000000E+00  0.00000000E+00
0.00000000E+00  0.00000000E+00  0.00000000E+00
0.00000000E+00  0.00000000E+00  0.00000000E+00
0.00000000E+00  0.00000000E+00  0.00000000E+00
```

#### (2) POSCAR\_Cu<sub>2</sub>O

mp-361\_Cu2O

```
1.0000000000000000
 8.6206524890209408  0.0000000000000000  0.0000000000000000
 0.0000000000000000  8.6206524890209408  0.0000000000000000
 0.0000000000000000  0.0000000000000000  4.3093959527676766
```

Cu O

16 8

Direct

```
0.1250000000000000  0.1250000000000000  0.7500000000000000
0.1250000000000000  0.3750000000000000  0.2500000000000000
0.3750000000000000  0.3750000000000000  0.7500000000000000
0.3750000000000000  0.1250000000000000  0.2500000000000000
0.6250000000000000  0.1250000000000000  0.7500000000000000
0.6250000000000000  0.3750000000000000  0.2500000000000000
0.8750000000000000  0.3750000000000000  0.7500000000000000
0.8750000000000000  0.1250000000000000  0.2500000000000000
0.1250000000000000  0.6250000000000000  0.7500000000000000
```



(3) POSCAR\_Cu<sub>2</sub>O<sub>0.25</sub>

mp-361\_Cu<sub>2</sub>O

```
1.0000000000000000
  6.2152103905328264  0.0000000000000000  0.0000000000000000
  0.0000000000000000  6.2152103905328264  0.0000000000000000
  0.0000000000000000  0.0000000000000000  2.7949763029051491
```

Cu O  
8 1

Direct

```
0.2945288037124518  0.0000000000000000  0.7580755226774989
0.7054711962875480  0.0000000000000000  0.7580755226774989
0.0000000000000000  0.7054711962875480  0.2419244773225013
0.0000000000000000  0.2945288037124518  0.2419244773225013
0.5000000000000000  0.2654405067245169  0.2530714263721562
0.5000000000000000  0.7345594932754835  0.2530714263721562
0.2654405067245169  0.5000000000000000  0.7469285736278439
0.7345594932754835  0.5000000000000000  0.7469285736278439
0.0000000000000000  0.0000000000000000  0.0000000000000000
```

```
0.00000000E+00  0.00000000E+00  0.00000000E+00
```

(4) POSCAR\_Cu<sub>2</sub>O<sub>0.50</sub>

mp-361\_Cu<sub>2</sub>O(2)

```
1.0000000000000000
  7.9112048288035677  0.0000000000000000  0.0000000000000000
  0.0000000000000000  7.9112048288035677  0.0000000000000000
  0.0000000000000000  0.0000000000000000  3.9539053727237752
```

Cu O  
16 4

Direct

```
0.1402238284721939  0.1402238284721939  0.7197515887227981
0.1402238284721939  0.3597761715278062  0.2802484112772020
0.3597761715278062  0.3597761715278062  0.7197515887227981
```

|                    |                    |                    |
|--------------------|--------------------|--------------------|
| 0.3597761715278062 | 0.1402238284721939 | 0.2802484112772020 |
| 0.6402238284721939 | 0.1402238284721939 | 0.7197515887227981 |
| 0.6402238284721939 | 0.3597761715278062 | 0.2802484112772020 |
| 0.8597761715278061 | 0.3597761715278062 | 0.7197515887227981 |
| 0.8597761715278061 | 0.1402238284721939 | 0.2802484112772020 |
| 0.1402238284721939 | 0.6402238284721939 | 0.7197515887227981 |
| 0.1402238284721939 | 0.8597761715278061 | 0.2802484112772020 |
| 0.3597761715278062 | 0.8597761715278061 | 0.7197515887227981 |
| 0.3597761715278062 | 0.6402238284721939 | 0.2802484112772020 |
| 0.6402238284721939 | 0.6402238284721939 | 0.7197515887227981 |
| 0.6402238284721939 | 0.8597761715278061 | 0.2802484112772020 |
| 0.8597761715278061 | 0.8597761715278061 | 0.7197515887227981 |
| 0.8597761715278061 | 0.6402238284721939 | 0.2802484112772020 |
| 0.0000000000000000 | 0.0000000000000000 | 0.0000000000000000 |
| 0.5000000000000000 | 0.0000000000000000 | 0.0000000000000000 |
| 0.0000000000000000 | 0.5000000000000000 | 0.0000000000000000 |
| 0.5000000000000000 | 0.5000000000000000 | 0.0000000000000000 |

|                |                |                |
|----------------|----------------|----------------|
| 0.00000000E+00 | 0.00000000E+00 | 0.00000000E+00 |

(5) POSCAR\_Cu<sub>2</sub>O<sub>0.75</sub>

mp-361\_Cu<sub>2</sub>O

1.0000000000000000



|                |                |                |
|----------------|----------------|----------------|
| 0.00000000E+00 | 0.00000000E+00 | 0.00000000E+00 |

2) OCCO adsorbed geometry

(1) POSCAR\_Cu

CONTCARCu

|                    |                    |                    |
|--------------------|--------------------|--------------------|
| 1.0000000000000000 |                    |                    |
| 10.104800224299999 | 0.0000000000000000 | 0.0000000000000000 |
| -5.052400112200000 | 8.751013694399992  | 0.0000000000000000 |
| 0.0000000000000000 | 0.0000000000000000 | 23.250499725299992 |
| Cu                 | O                  | C                  |
| 80                 | 2                  | 2                  |

Direct

|                     |                    |                    |
|---------------------|--------------------|--------------------|
| 0.0000415259777622  | 0.0001805602436433 | 0.3588397140668504 |
| -0.0003658043822531 | 0.2489412303964707 | 0.3587977329688091 |
| 0.2465183287921035  | 0.2471625606524975 | 0.3573188597128536 |
| 0.2504062736285568  | 0.0000887184177177 | 0.3584667399899272 |
| 0.5000093717832975  | 0.0002075707185263 | 0.3586578712946409 |
| 0.4998573554009333  | 0.2471774103100109 | 0.3579850781518562 |
| 0.7515054016144963  | 0.2487746660671452 | 0.3587307045125647 |
| 0.7506556353955075  | 0.0001207132691428 | 0.3588346652605435 |
| 0.0017497586155874  | 0.4999611448211182 | 0.3580277880850666 |
| 0.0032909631661225  | 0.7520587652741000 | 0.3588659794939568 |
| 0.2508042232092555  | 0.7511115217653622 | 0.3582461166524032 |
| 0.2458103474221105  | 0.4998619392813312 | 0.3572477175155790 |
| 0.4894792250666513  | 0.4996511741555102 | 0.3597626813363516 |
| 0.4998297632367660  | 0.7529820745930040 | 0.3575135029155007 |
| 0.7536112484016646  | 0.7526835445034225 | 0.3588517181551589 |
| 0.7545265270821045  | 0.5002709414516385 | 0.3643247146903869 |
| 0.1679048966775530  | 0.3334577228155374 | 0.2673702538933481 |
| 0.1673441524338632  | 0.0826851345958898 | 0.2673790425456808 |
| 0.4183930000949480  | 0.0839695821448100 | 0.2677555443319402 |
| 0.4186520687848106  | 0.3348268094862938 | 0.2688181852763944 |
| 0.6688028577886880  | 0.3355798725022452 | 0.2692230547156159 |
| 0.6680479244884275  | 0.0835512001382445 | 0.2681003011019410 |
| 0.9180913957058732  | 0.0835534192655679 | 0.2679140269239999 |

|                    |                     |                     |
|--------------------|---------------------|---------------------|
| 0.9175373313011846 | 0.3337554400355257  | 0.2680933958091471  |
| 0.1672103123446956 | 0.8329564160223555  | 0.2678417387463415  |
| 0.1676476530153622 | 0.5841406012918171  | 0.2671295196977970  |
| 0.4183857815878370 | 0.5828520328728481  | 0.2679854115012947  |
| 0.4178732963148089 | 0.8337065230102481  | 0.2673479935128359  |
| 0.6683162208893113 | 0.8324575642590611  | 0.2683629205829282  |
| 0.6666588157280943 | 0.5818447130403336  | 0.2699435487121130  |
| 0.9156576191843248 | 0.5826034079696241  | 0.2692548717969677  |
| 0.9175378595073748 | 0.8329446926014642  | 0.2681234085633705  |
| 0.3354842210267470 | 0.1674077327363832  | 0.1775832036707524  |
| 0.3350978944163183 | 0.4165768180086079  | 0.1770955040313086  |
| 0.0846750932390991 | 0.4168917261717220  | 0.1774001432584550  |
| 0.0852429788858425 | 0.1668465126052729  | 0.1771826157046559  |
| 0.8352714874769860 | 0.1670539860034451  | 0.1775895017767203  |
| 0.8346435779892569 | 0.4168377219980422  | 0.1777339750438210  |
| 0.5848525325496085 | 0.4169576495186934  | 0.1774004533890594  |
| 0.5857231383043645 | 0.1677265215727509  | 0.1779185525449340  |
| 0.3347186362223165 | 0.6665529648417582  | 0.1770906351245830  |
| 0.3345669633583306 | 0.9168600891915104  | 0.1774737242585121  |
| 0.0844740374920725 | 0.9164043149506891  | 0.1773004232152349  |
| 0.0838719426848332 | 0.6664053979880962  | 0.1775931472457564  |
| 0.8339960666620362 | 0.6662396763119308  | 0.1780309031887896  |
| 0.8347732763423759 | 0.9165072371641129  | 0.1776024276181484  |
| 0.5853506519762810 | 0.9168078122610881  | 0.1777157972875480  |
| 0.5849860071524493 | 0.6664381843300664  | 0.1774863216745176  |
| 0.0006837098416001 | -0.0001601688013264 | 0.0869652467438818  |
| 0.0010714691844996 | 0.2500817870985910  | 0.0869875323541534  |
| 0.2510586324513239 | 0.2498626218895177  | 0.0867109009676101  |
| 0.2508466164368297 | 0.0000109273850612  | 0.0869796343947914  |
| 0.5009465014396471 | -0.0000238458316366 | 0.0873528882025111  |
| 0.5010122118612970 | 0.2498147387798652  | 0.0869860138207533  |
| 0.7509161763152792 | 0.2499289796592716  | 0.0871721510304078  |
| 0.7509189162165579 | -0.0000527472914126 | 0.0871014640676660  |
| 0.0010011833855575 | 0.5000631093808708  | 0.0868796750535769  |
| 0.0004833944557306 | 0.7498896649502417  | 0.0870764347926844  |
| 0.2505703604109024 | 0.7500125601269383  | 0.0869678148341851  |
| 0.2506725386590922 | 0.5000331289075108  | 0.0867226268241888  |
| 0.5008769730035905 | 0.5002201571780969  | 0.0867586212042552  |
| 0.5009340200053690 | 0.7502662678685144  | 0.0869881419207725  |
| 0.7508568730833127 | 0.7499372495846334  | 0.0870540596264597  |
| 0.7511928480640119 | 0.5001615189392694  | 0.0870936650415967  |
| 0.1667705176872601 | 0.3331801101640036  | -0.0040184331864573 |
| 0.1668665567840121 | 0.0832464178166392  | -0.0039072100368525 |
| 0.4169988562036059 | 0.0831941605127683  | -0.0036969580191562 |







|                |                |                |
|----------------|----------------|----------------|
| 0.00000000E+00 | 0.00000000E+00 | 0.00000000E+00 |

(2) POSCAR\_Cu<sub>2</sub>O

CONTCAR1

|                    |                     |                     |
|--------------------|---------------------|---------------------|
| 1.0000000000000000 |                     |                     |
| 8.5391998290999993 | 0.0000000000000000  | 0.0000000000000000  |
| 0.0000000000000000 | 12.0762996674000007 | 0.0000000000000000  |
| 0.0000000000000000 | 0.0000000000000000  | 24.0571994780999994 |
| Cu                 | O                   | C                   |
| 56                 | 26                  | 2                   |

Direct

|                     |                     |                    |
|---------------------|---------------------|--------------------|
| 0.2014615371815277  | 0.1830082828201165  | 0.0252670699708381 |
| 0.2374925673620507  | 0.0022243596019939  | 0.1509956535085485 |
| 0.2687172546253633  | 0.2428398221379319  | 0.2516949626986544 |
| 0.2580423463554037  | 0.0491821257726902  | 0.3645246959397446 |
| 0.1104767245191337  | -0.0049728922784812 | 0.0038941211090119 |
| 0.2657439557074107  | 0.2356118242171555  | 0.1310620611463856 |
| 0.2184423068936015  | -0.0197433711512800 | 0.2655956028669961 |
| 0.2197135584734305  | 0.2455398170801448  | 0.3689496267452156 |
| 0.0185058133794275  | 0.3721999734743204  | 0.0572759724541412 |
| -0.0219844304092196 | 0.1158124613605159  | 0.1921977898709458 |
| 0.0175356707942018  | 0.3638498330661962  | 0.3134554542228788 |
| -0.0243670867479266 | 0.1304249683498724  | 0.0782853322291125 |
| 0.0301238505567067  | 0.3605592842887724  | 0.1882175559640973 |
| 0.0559994159868246  | 0.1440615815543783  | 0.3063010148219781 |
| 0.7335827964295540  | 0.3659303953587603  | 0.0206193647262628 |
| 0.7228471841972924  | -0.0040597230433847 | 0.1213010684805584 |
| 0.7619724778315533  | 0.2484698886126560  | 0.2417674582262897 |
| 0.8789093590308764  | -0.0016339808468341 | 0.3402819367517503 |

|                     |                     |                     |
|---------------------|---------------------|---------------------|
| 0.8335972210635529  | -0.0072560151909018 | 0.0138595823602354  |
| 0.7491329922302344  | 0.2523208887431544  | 0.1217498265215753  |
| 0.7198292313064100  | 0.0071266847658081  | 0.2552140856300794  |
| 0.6951918902839378  | 0.2850501342660566  | 0.3473568930628845  |
| 0.4896500526076447  | 0.3720518941324992  | 0.0730591118391011  |
| 0.4972638066184794  | 0.1220698089026946  | 0.1952786212892440  |
| 0.4965992534145925  | 0.3760091713743559  | 0.2918941646020887  |
| 0.5053601535674237  | 0.1151634274197604  | 0.0619219816838199  |
| 0.4898716022297194  | 0.3739534037717064  | 0.1833686655701615  |
| 0.5195209279703373  | 0.1267117362960963  | 0.3230638331810666  |
| 0.1878057123957626  | 0.8034081471964236  | 0.0248571185734939  |
| 0.2494184868524507  | 0.4969719205777517  | 0.1169609181201496  |
| 0.2694361707589341  | 0.7645470911507024  | 0.2526853719777963  |
| 0.2930807216595666  | 0.5302492974304207  | 0.3740575354041120  |
| 0.3386614723862205  | 0.5028985308694611  | 0.0081638249809698  |
| 0.2533917795494238  | 0.7634532769817143  | 0.1350356355607094  |
| 0.2562540114561897  | 0.4925984636662345  | 0.2494835478481998  |
| 0.2306945853641761  | 0.7233285609054355  | 0.3588627270573101  |
| -0.0163923216076293 | 0.8744146867010674  | 0.0837431622795601  |
| 0.0248908942006199  | 0.6324494587095855  | 0.1904454680059674  |
| -0.0024268858684298 | 0.8184008127186609  | 0.3237928581357949  |
| 0.0174937600189538  | 0.6194186916227798  | 0.0597735425509346  |
| -0.0300943983384737 | 0.8807793617625552  | 0.1944059539247219  |
| 0.0165052861249323  | 0.5969698409778440  | 0.3197227198705940  |
| 0.6956705541769348  | 0.7083810274912870  | 0.0233816508378774  |
| 0.7760475704225687  | 0.4972491630925384  | 0.1297838964256752  |
| 0.7603865186860345  | 0.7293207464886443  | 0.2517863695184679  |
| 0.6375259724534383  | 0.4833359965404997  | 0.3614618944815916  |
| 0.6066307864637106  | 0.5318742531614331  | -0.0141737320743092 |
| 0.7644995511936850  | 0.7441856614360411  | 0.1292182858368025  |
| 0.7790416559741272  | 0.4963221198412847  | 0.2358156042943360  |
| 0.7141851215702920  | 0.6662335894701797  | 0.3777385845779246  |
| 0.5062525922613398  | 0.8676937837716723  | 0.0611657381219914  |
| 0.4930864933225206  | 0.6283586521779150  | 0.1865036798947678  |
| 0.5303616279337874  | 0.8910461558355162  | 0.3217948872939259  |
| 0.4874325907449751  | 0.6247817245377197  | 0.0772101102024253  |
| 0.5040543132115521  | 0.8748254285036396  | 0.1972728104514501  |
| 0.5045062388004597  | 0.6365011100523973  | 0.2959041711567763  |
| 0.0996717894756106  | 0.0055834064717167  | 0.0933670175509737  |
| 0.1318014296860683  | 0.2267021676581744  | 0.1921560641667600  |
| 0.0930365334516455  | -0.0463996869280280 | 0.3308947194209415  |
| 0.3794274396014095  | 0.2401124216171861  | 0.0647227943823765  |
| 0.3751440385996645  | -0.0025199681835839 | 0.2098841721948188  |
| 0.3947476816804225  | 0.2512783248461332  | 0.3152280883849594  |
